# Supplementary material for: Development and psychometric evaluation of the Japanese version of the Physical Effort Scale
Source: Research Square preprint supplement (doi:10.21203/rs.3.rs-7515948/v1), 2025-09-04
Supplement: Supplementary file 1 [file a1527ce3a7a59d75629476ad.pdf]

## Physical Effort Scale

以下の質問は、心拍数が上がったり息がはずんだりするような、身体的な努力に関するものです。身体的な努力とは、身体活動中に自覚する労力（どのくらいがんばっているのかという感覚）のことです。それぞれの質問について、1～5 までの数字のうち最もよくあてはまるものに○をつけてください。回答に正解や不正解はありません。

|    |                                                                 | 1 全くあてはまらない      | 2 あてはまらない     | 3 どちらでもない      | 4 あてはまる        | 5 非常によくあてはまる     |
|----|-----------------------------------------------------------------|------------------|---------------|----------------|----------------|------------------|
| 1. | 身体的な努力を必要とする活動が好きです。                                            | 1                | 2             | 3              | 4              | 5                |
| 2. | 身体的な努力を求められる状況を避けることが多いです。                                      | 1                | 2             | 3              | 4              | 5                |
| 3. | 身体的な努力を費やすことを思うと前向きな気持ちになります。                                   | 1                | 2             | 3              | 4              | 5                |
| 4. | 身体的な努力を必要とする作業から距離をおく傾向があります。                                   | 1                | 2             | 3              | 4              | 5                |
| 5. | 身体的な努力を費やすことに魅力を感じません。<br>(この質問のみ否定文なので、誤解のないように選択肢に説明を加えています。) | 1<br>(非常に魅力を感じる) | 2<br>(魅力を感じる) | 3<br>(どちらでもない) | 4<br>(魅力を感じない) | 5<br>(全く魅力を感じない) |
| 6. | 身体的な努力を伴う活動は楽しいです。                                              | 1                | 2             | 3              | 4              | 5                |
| 7. | 身体的な努力を伴う活動が嫌いです。                                               | 1                | 2             | 3              | 4              | 5                |
| 8. | 身体的な努力を伴う活動に進んで取り組みます。                                          | 1                | 2             | 3              | 4              | 5                |
